# Supplementary material
Source: Springer Nature journal article supplement (https://www.springermedizin.de/resource/supplementary/12889_2013_7499_MOESM3_ESM.pdf/9497888)

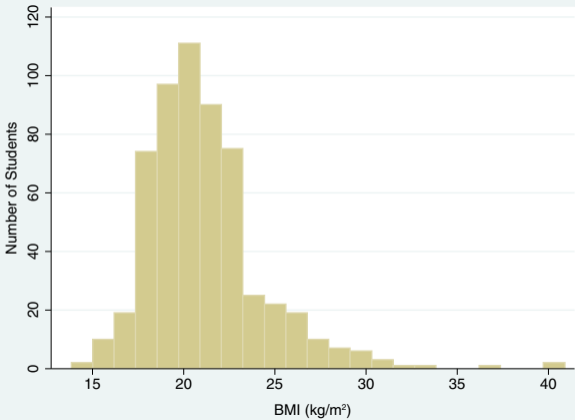

Supplement: MOESM3 [file 9497888]
